# Supplementary material for: Response Surface Methodology and Textural Profile Analysis for Optimization of Fruit Peel-Based Extruded Snack (Elbow Macaroni)
Source: Hindawi journal article supplement (doi:10.1155/2022/5881459), 2022-04-16
Supplement: f1 [file 5881459.f1.docx]

**Supplementary Material**

**Supplementary Table**

**Table S1** Factors and levels for optimizing the ingredients for development of fruit peel macaroni

| Independent Variables | | Levels | | |
| --- | --- | --- | --- | --- |
| Min |  | Max |
| Factor | Name | -1 | 0 | +1 |
| A | Semolina (%) | 30 |  | 60 |
| B | Fruit Peel blend (%) | 10 |  | 30 |
| C | Finger millet (%) | 10 |  | 30 |

**Table S2** The experimental design (factor and responses) for optimization of ingredient in fruit peel macaroni

|  |  | Factor 1 | Factor 2 | | Factor 3 | | R1 | R 2 | R 3 | R4 | R 5 | R 6 | R 7 |
| --- | --- | --- | --- | --- | --- | --- | --- | --- | --- | --- | --- | --- | --- |
| Std | Run | A:Semolina | | B:FPB | | C:Finger millet | Texture | C & A | O A | Energy (kcal) | Proteing/100g | Fibre mg/100g | Ca mg/100 g |  |
| 1 | 10 | 30 | | 10 | | 10 | 5.63 | 5.58 | 5.59 | 317.6 | 9.64 | 2.77 | 26.58 |  |
| 2 | 7 | 60 | | 10 | | 10 | 6.67 | 7.56 | 6.86 | 333.6 | 11.44 | 3.15 | 26.45 |  |
| 3 | 13 | 30 | | 30 | | 10 | 5.45 | 6.19 | 6.32 | 317.1 | 9.48 | 2.65 | 26.41 |  |
| 4 | 6 | 60 | | 30 | | 10 | 6.72 | 7.75 | 6.99 | 336.8 | 11.51 | 3.29 | 27.79 |  |
| 5 | 18 | 30 | | 10 | | 30 | 5.66 | 6.09 | 6.08 | 318.2 | 9.87 | 2.88 | 27.66 |  |
| 6 | 11 | 60 | | 10 | | 30 | 6.58 | 7.27 | 5.15 | 339.6 | 11.64 | 3.31 | 28.05 |  |
| 7 | 17 | 30 | | 30 | | 30 | 6.07 | 5.83 | 4.56 | 318.8 | 10.08 | 2.97 | 27.93 |  |
| 8 | 20 | 60 | | 30 | | 30 | 6.71 | 7.71 | 5.32 | 340 | 11.7 | 3.65 | 28.12 |  |
| 9 | 8 | 19.77 | | 20 | | 20 | 5.34 | 6.2 | 6.21 | 316.4 | 9.4 | 2.45 | 25.23 |  |
| 10 | 3 | 70.23 | | 20 | | 20 | 6.87 | 7.86 | 7.55 | 339.8 | 11.58 | 3.39 | 27.62 |  |
| 11 | 16 | 45 | | 3.18 | | 20 | 6.62 | 7.23 | 6.21 | 327 | 10.58 | 3.05 | 27.46 |  |
| 12 | 1 | 45 | | 36.82 | | 20 | 7 | 8.25 | 6.42 | 328.2 | 10.98 | 3.22 | 28.54 |  |
| 13 | 5 | 45 | | 20 | | 3.18 | 6.43 | 7.33 | 8.16 | 318 | 10.24 | 3.01 | 26.06 |  |
| 14 | 4 | 45 | | 20 | | 36.82 | 5.32 | 6.19 | 5.04 | 329.2 | 11.22 | 3.25 | 28.93 |  |
| 15 | 14 | 45 | | 20 | | 20 | 6.65 | 7.39 | 5.58 | 327.6 | 10.66 | 3.1 | 27.53 |  |
| 16 | 9 | 45 | | 20 | | 20 | 6.65 | 7.39 | 5.58 | 327.6 | 10.66 | 3.1 | 27.53 |  |
| 17 | 12 | 45 | | 20 | | 20 | 6.65 | 7.39 | 5.58 | 327.6 | 10.66 | 3.1 | 27.53 |  |
| 18 | 2 | 45 | | 20 | | 20 | 6.65 | 7.39 | 5.58 | 327.6 | 10.66 | 3.1 | 27.53 |  |
| 19 | 19 | 45 | | 20 | | 20 | 6.65 | 7.39 | 5.58 | 327.6 | 10.66 | 3.1 | 27.53 |  |
| 20 | 15 | 45 | | 20 | | 20 | 6.65 | 7.39 | 5.58 | 327.6 | 10.66 | 3.1 | 27.53 |  |


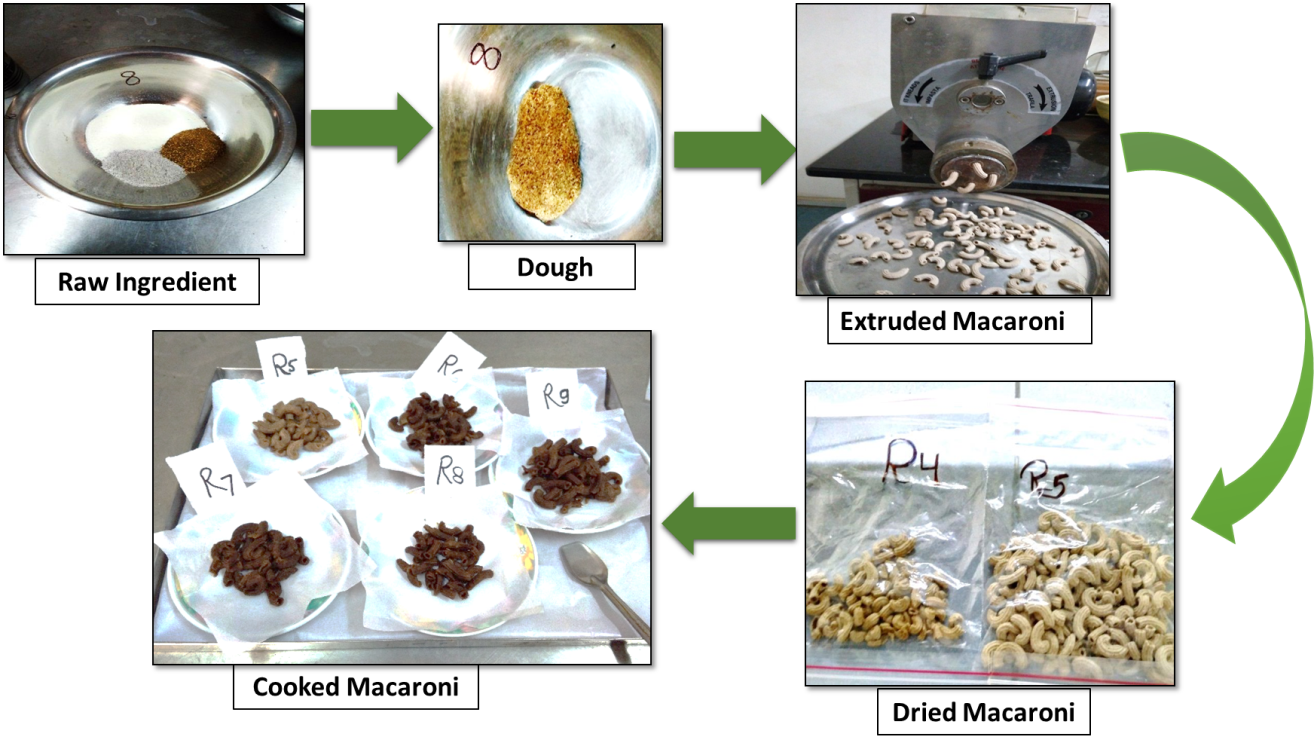


**Fig. S1** Pictorial representation for preparation of the fruit peel macaroni

**Fig. S2** Nutritional profile of papaya and banana peel

**Fig. S3** Mineral profile of papaya and banana peel
